# Supplementary material
Source: PubMed Central journal article supplement (PMC3303990)
Supplement: NIHMS354419-supplement-01.pdf [file NIHMS354419-supplement-01.pdf]

**Capture of the volatile carbonyl metabolite of flecainide  
on 2,4-dinitrophenylhydrazine cartridge for  
quantitation by stable-isotope dilution mass  
spectrometry coupled with chromatography**

**Laszlo Prokai<sup>a,\*</sup>, Szabolcs Szarka<sup>a</sup>, Xiaoli Wang<sup>1</sup>, Katalin Prokai-Tatrai<sup>a,b</sup>**

<sup>a</sup>Department of Molecular Biology and Immunology, University of North Texas Health Science Center, 3500 Camp Bowie Boulevard, Fort Worth, TX 76107-2699, USA

<sup>b</sup>Department of Pharmacology and Neuroscience, University of North Texas Health Science Center, 3500 Camp Bowie Boulevard, Fort Worth, TX 76107-2699, USA

**Supplementary Information**

**Fig. S7.** Full-scan LC-ESI mass spectrum (A) of TFAA-*d*<sub>3</sub>-DNPH and CID-MS/MS spectrum (B) of the *m/z* 280 [M-H]<sup>-</sup> ion.

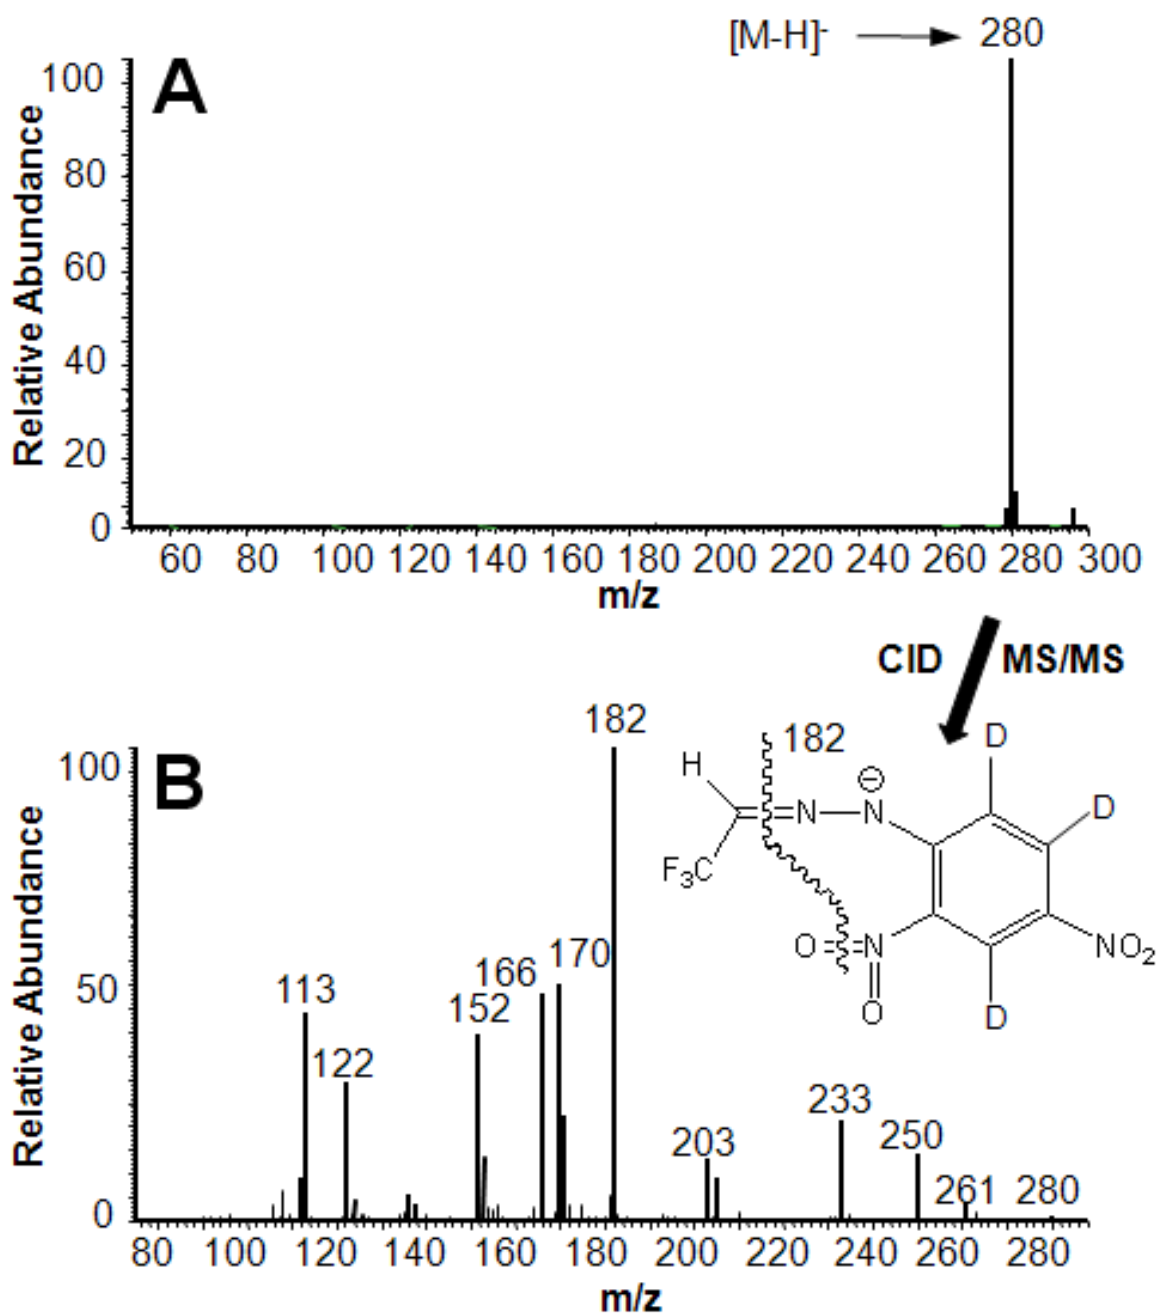

**Fig. S8.** Full-scan LC-ESI mass spectrum (A) of TFAA- $^{15}\text{N}_4$ -DNPH and CID-MS/MS spectrum (B) of the  $m/z$  281  $[\text{M}-\text{H}]^-$  ion.

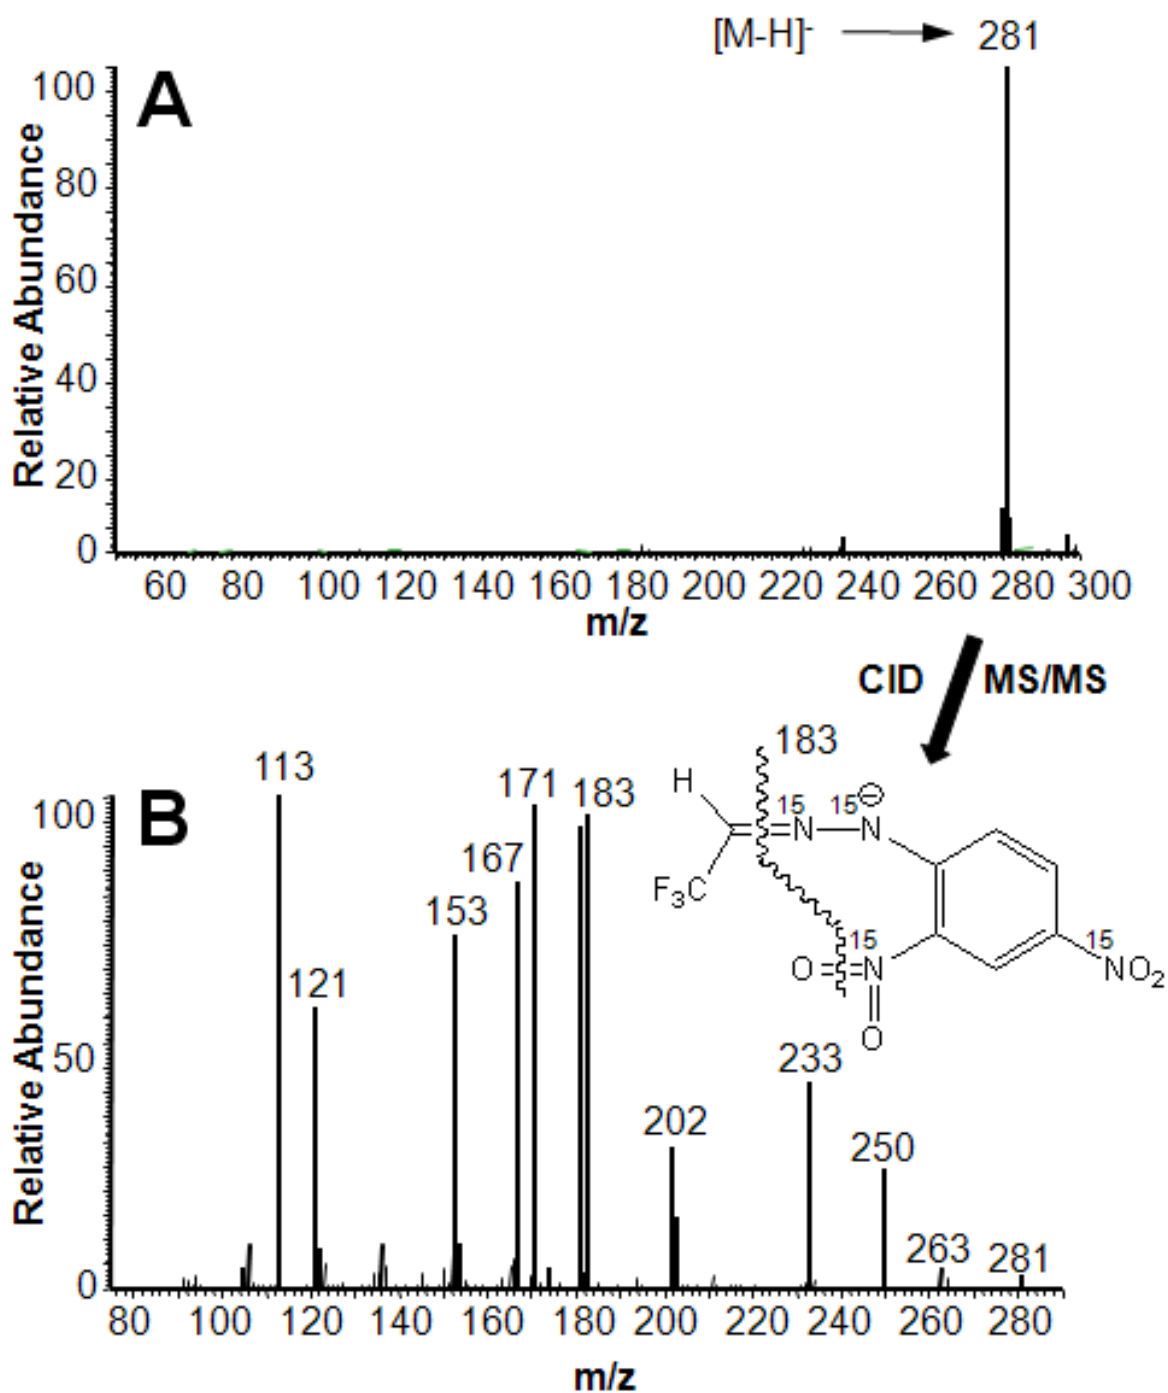

**Supplementary Table 1**

Summary method validation results for of the LC-ESI-MS using narrow-range scans ( $m/z$  275 to 283).

| TFAA-DNPH<br>(ng injected) | Repeatability                   |                        |                                     |                        |
|----------------------------|---------------------------------|------------------------|-------------------------------------|------------------------|
|                            | Area Ratio (RSD %) <sup>a</sup> |                        | Retention Time (RSD %) <sup>b</sup> |                        |
|                            | Intra-day <sup>c</sup>          | Inter-day <sup>d</sup> | Intra-day <sup>c</sup>              | Inter-day <sup>d</sup> |
| 5                          | 6.1                             | 11.8                   | 0.19                                | 0.49                   |
| 10                         | 3.7                             | 4.0                    | 0.25                                | 0.56                   |
| 100                        | 2.8                             | 2.6                    | 0.29                                | 0.57                   |

  

| $C_Q$ <sup>e</sup> (ng/ $\mu$ L) | Accuracy                                  |                   |              |
|----------------------------------|-------------------------------------------|-------------------|--------------|
|                                  | $C_M$ <sup>f</sup> $\pm$ SD (ng/ $\mu$ L) | Precision (RSD %) | Accuracy (%) |
| 1.56                             | 1.45 $\pm$ 0.05                           | 3.7               | -7.3         |
| 6.25                             | 5.95 $\pm$ 0.08                           | 1.4               | -4.9         |
| 25                               | 25.4 $\pm$ 0.7                            | 2.8               | 1.7          |

<sup>a</sup> Area Ratio (RSD %) denotes precision expressed in RSD % of analyte/IS area ratios.

<sup>b</sup> Retention Time (RSD %) denotes precision expressed in RSD % of retention times.

<sup>c</sup>  $n = 5$ .

<sup>d</sup>  $n = 15$ .

<sup>e</sup>  $C_Q$  denotes the nominal concentration of TFAA-DNPH in QC samples.

<sup>f</sup>  $C_M$  denotes the measured concentration of TFAA-DNPH in QC samples.
